# Supplementary material for: Membrane Fluidity and Temperature Sensing Are Coupled via Circuitry Comprised of Ole1, Rsp5, and Hsf1 in Candida albicans
Source: PubMed Central journal article supplement (PMC4135801; doi:10.1128/ec.00138-14), 2014-08
Supplement: EC.00138-14_zek999094317so1.pdf [file EC.00138-14_zek999094317so1.pdf]

### **Supplemental Figure Legends**

**Figure S1: *HSF1*, *HSP21* and *HSP104* expression upon depletion of *OLE1* in *C. albicans tetO-OLE1/ole1*Δ cells at different growth temperatures.** WT (wild type, CaLC2993: Table 1) and doxycycline-conditional *C. albicans tetO-OLE1/ole1*Δ cells (CaLC3032) were treated with 0 or 1 μg/ml doxycycline, and expression of *HSF1*, *HSP21* and *HSP104* was monitored by qRT-PCR during growth at 30°C, 37°C, 42°C or after a 15 minute 30°C to 42°C heat shock (HS), relative to the internal *ACT1* mRNA control.

**Figure S2: *Rsp5* depletion affects *OLE1* and *HSP* expression.** (A) qRT-PCR of WT (wild type, CaLC2993: Table 1) and doxycycline-conditional *C. albicans tetO-RSP5/rsp5*Δ cells (CaLC3366) treated with 0 or 20 μg/ml doxycycline, illustrate a loss of *OLE1* transcript upon depletion of *RSP5*. Data relative to the *ACT1* mRNA control. *HSP104* (B), *HSP21* (C), *OLE1* (D) and *RSP5* (E) transcript levels in WT and *tetO-RSP5/rsp5*Δ cells treated with 0 (-) or 20 μg/ml (+) doxycycline for 18 + 5 hours at 30°C or after a 15 minute 30°C to 42°C heat shock (HS), relative to the internal *ACT1* mRNA control.

Supplementary data Figure 1: Leach *et al.*

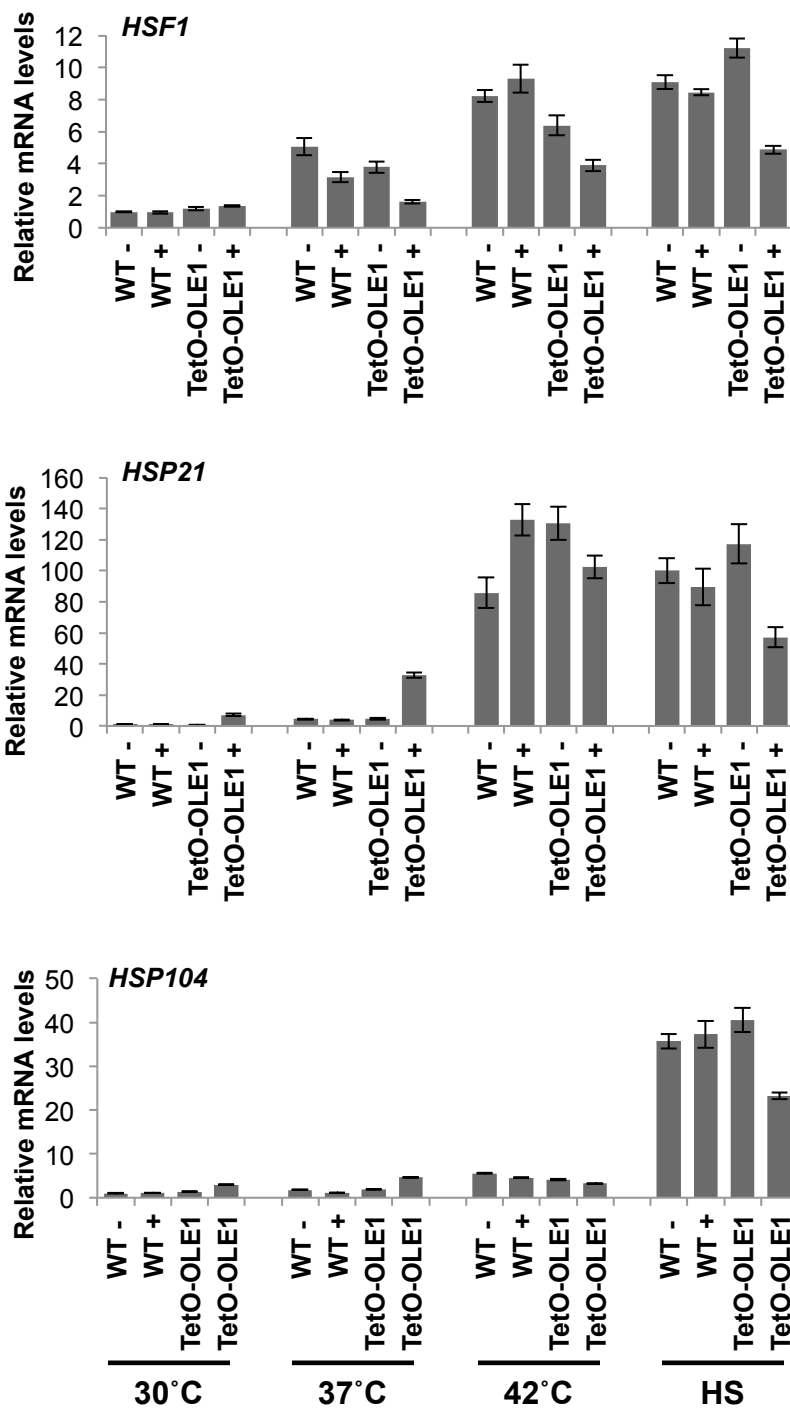

Supplementary data Figure 2: Leach *et al.*

A

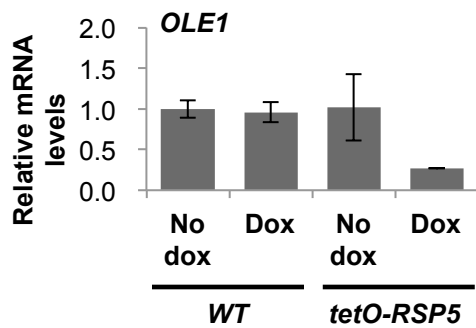

B

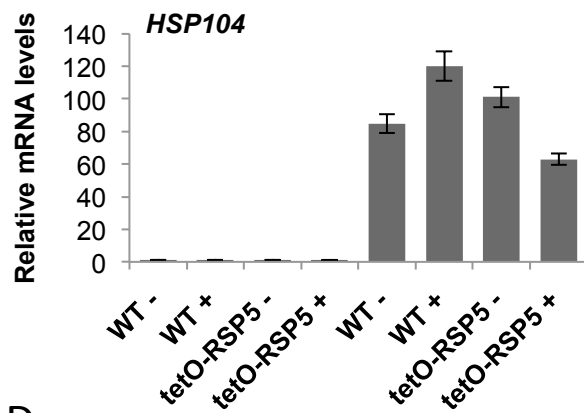

C

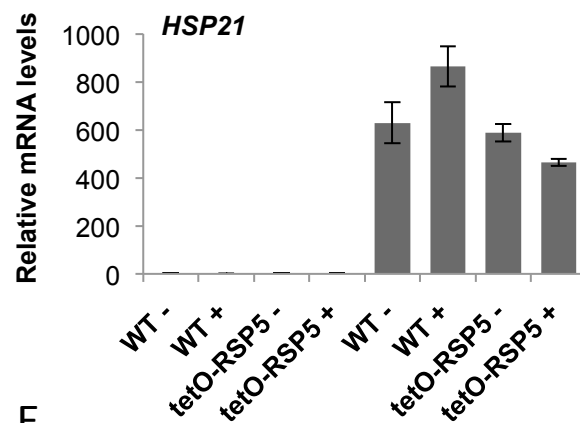

D

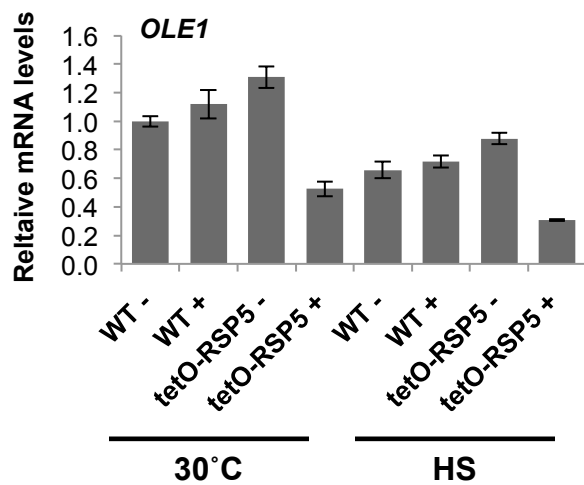

E

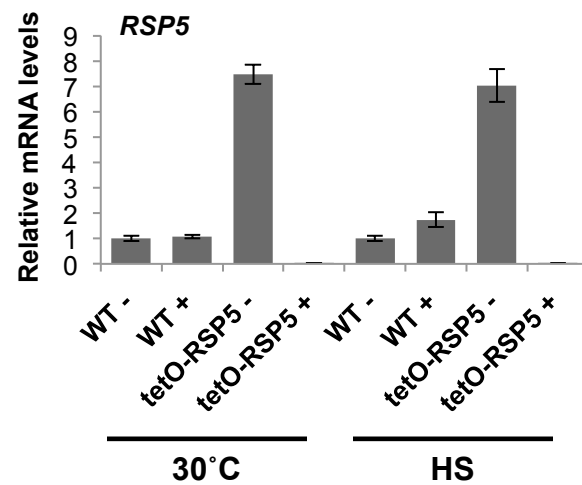

**Table S1: Primers used in this study.**

|         |                             |                                                                                                     |
|---------|-----------------------------|-----------------------------------------------------------------------------------------------------|
| oLC2798 | CaOLE1-NAT1 F1              | TCGATCAAGTAACACATACTGTTATTACAA<br>GAACTTGAAAGTCAAGACCAAACAAATTA<br>GCATTTACAGGAAACAGCTATGACCATG     |
| oLC2799 | CaOLE1-NAT1 R1              | AAACAAAAATGACAGAAAATGAAAACGAA<br>AAATGAAAGAAAACAAATCAACCCAGCAA<br>TTTTCTATTTGCGTAAAACGACGGCCAG      |
| oLC2802 | CaOle1d Ext F (-306<br>bp)  | GTATCAGAGGCCAAAGTAATG                                                                               |
| oLC2803 | CaOle1d Ext R (+1667<br>bp) | CTTACAGACACTGAACTTG                                                                                 |
| oLC274  | pJK863down-F                | CTGTCAAGGAGGGTATTCTGG                                                                               |
| oLC275  | pJK863up-R                  | AAAGTCAAAGTTCCAAGGGG                                                                                |
| oLC2801 | CaOLE1-NAT1<br>pLC330 R1    | TATTAGTACCAGCAGCAATGGCATTCAATT<br>TAGTGATATCAACAGTTTCAAGTTGTTCAA<br>CTGTAGTCATcgactatttatattgtatg   |
| oLC2804 | CaOle1d Int R (+125<br>bp)  | CAGTGACCTTAACTAAATCG                                                                                |
| oLC300  | Tetp-F-NotI                 | ATAAGAATGCGGCCGCGTTTGGTTCAGCAC<br>CTTGTCG                                                           |
| oLC3359 | CaRSP5-NAT1 F2              | TTCTCAGTTGAGTTGAGTTGAGGTTCAACAT<br>TCATTTGTCACTCACTCACTCACTCCCCTTC<br>TTCCCTTTGGAAACAGCTATGACCATG   |
| oLC3360 | CaRSP5-NAT1 R2              | CAAACAAATATAAGTATATGTATGTATGTA<br>TATATAAATATAAATGTATAACCAGAAAGA<br>AAGAAAGGTAAAACGACGGCCAG         |
| oLC3361 | CaRSP5d Ext F (-320<br>bp)  | GCTGTTTCGGTTGTAATTAG                                                                                |
| oLC3362 | CaRSP5d Ext R<br>(+2775 bp) | CAACGTCAACTCTTCAAATC                                                                                |
| oLC3388 | CaRSP5_TetO_pLC60<br>5      | CAGCAACAACCTTAAACGTTGATGGTGGTAG<br>TATTGTTGTTGCTCCTTGATGTAGATATATT<br>AGGAGCCA Tcgactatttatattgtatg |
| oLC3389 | CaRSP5+542 R                | GTTGAGTTTGCAGTAGTAG                                                                                 |
| oLC3357 | CaRSP5-NAT1 F1              | TATACCATTCAATTTCTTCCATTTGTTCAAC<br>CTTCCCATCAATCGAAGAAAACCTCTGTGTT<br>GTATAAATTGGAAACAGCTATGACCATG  |
| oLC534  | CaTAR-797-R                 | gatggagatagtttacgg                                                                                  |
| oLC2922 | CaHsf1-TAP ARG R            | TATACCTAAACAACGAAAATAATGAATTGA<br>AAAATATAATGATTATAGACACACTTCATC<br>TATATCCTATtcgatgaattcgagctcgtt  |
| oLC2950 | CaHsf1-TAP-ARG4-F           | TAACATAAATGATTCTAATGGTAATGAGAA<br>GAAACTGAAGAAAAGATCAATCGAAGAAG                                     |

|         |                              |                                |
|---------|------------------------------|--------------------------------|
|         |                              | TTAGCGATCATggtcgacggatccccgggt |
| oLC1593 | TAP-R                        | TAAACTTTGGATGAAGGCG            |
| oLC1594 | ARG4-F                       | ATGTTGGCTACTGATTTAGCTG         |
| oLC1597 | CaHsf1+1978-F                | GGACAATCAATTCAGCAAGTG          |
| oLC1598 | CaHsf1+2607-R                | GCATTTACTCTCAATAGAGTG          |
| oLC1620 | Hsp104+1402-F                | CGAGCTAGTCATGAACAATTG          |
| oLC1621 | Hsp104+1660-R                | GGATACCAGTCAATCTAGCA           |
| oLC3217 | CaHSP21+90-F                 | CCAAGAAAATTGCTCAAGG            |
| oLC3218 | CaHSP21+325-R                | CTTCATCAGGACTCAAATTC           |
| oLC2805 | CaOle1 RT-PCR F<br>(+353 bp) | GACTCTAGTGTTGACATTTG           |
| oLC2806 | CaOle1 RT-PCR R<br>(+537 bp) | GTGAATACGATGAGAATGAC           |
| oLC3408 | CaRSP5+1077 F                | GGTTGGGAACAAAGATTTAC           |
| oLC3409 | CaRSP5+1273 R                | GAGCAGTATTGGTTAATCTC           |
| oLC3168 | CaFAS2+438-F                 | CAAGGCTAACTTGTTAATCC           |
| oLC3169 | CaFAS2+658-R                 | GAAGTCTTTCCTAATTGACC           |
| oLC2285 | CaACT1+855-F                 | GACCTTGAGATACCCAATTG           |
| oLC2286 | CaACT1+1076-R                | CAGCTTGAATGGAAACGTAG           |
